# Supplementary material
Source: HighWire-hosted journal article supplement (https://cmaj.ca/highwire/filestream/73754/field_highwire_adjunct_files/1/190339-res-2-at.pdf)

**Appendix 2 (as supplied by the authors): Frequency and Timing of Hospitalized Allopurinol-Associated Severe Cutaneous Adverse Reactions**

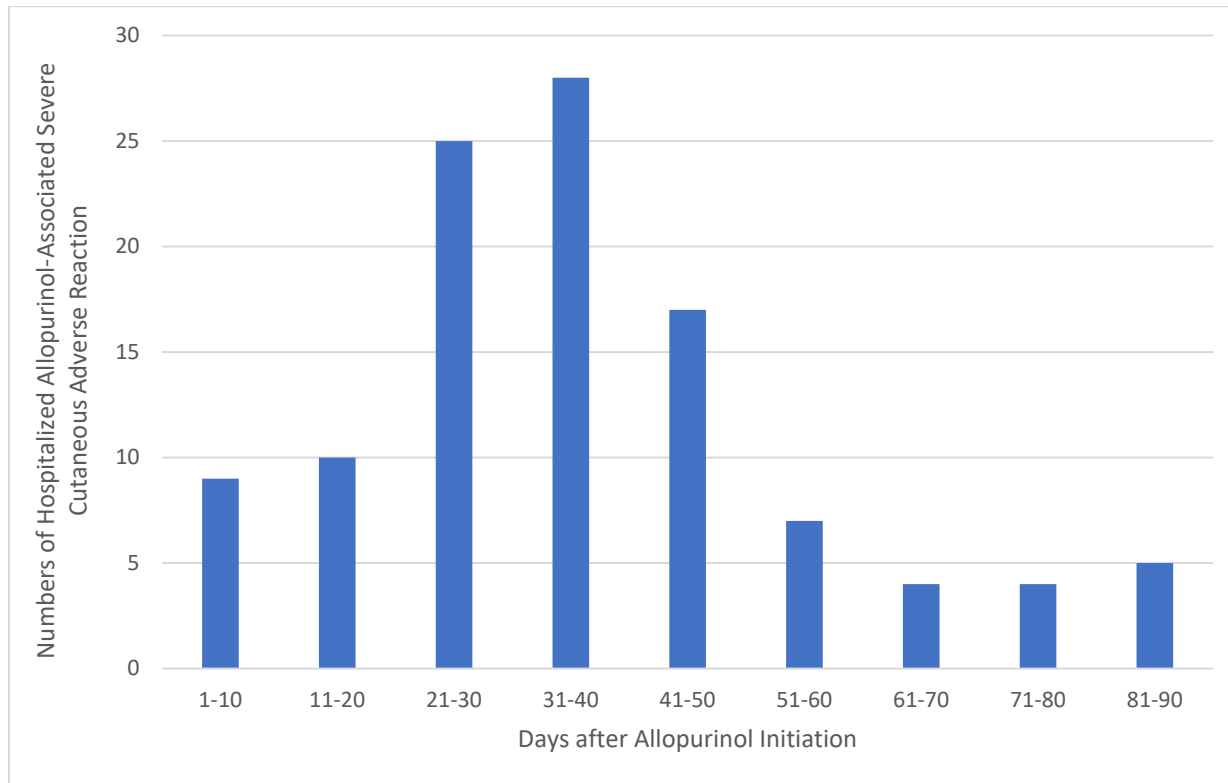

Supplement: 190339-res-2-at.pdf [file 190339-res-2-at.pdf]
